# Supplementary material
Source: Elsevier journal article supplement (https://www.sciencedirect.com/science/article/pii/S1575181318303371)
Supplement: mmc1 [file S1575181318303371:mmc1.docx]

**Anexos**

Enlace al Canal de YouTube: PECHA KUCHA DE PRUEBAS Y EXPLORACIONES COMPLEMENTARIAS (<https://goo.gl/Hkak0Z>).

Enlace a la asignatura Talleres Integrados II donde esta enlazado al video de presentación en formato Pecha Kucha, el pdf del presentación y al texto escrito de la presentación (<http://umh1935.edu.umh.es/>).
